# Supplementary material for: A comprehensive framework of E2–RING E3 interactions of the human ubiquitin–proteasome system
Source: PubMed Central journal article supplement — Mol Syst Biol. 2009 Aug 18;5:295. doi: 10.1038/msb.2009.55 (PMC2736652; doi:10.1038/msb.2009.55), 2009-08-18
Supplement: msb200955-s1.pdf [file msb200955-s1.pdf]

## **Supplementary information Van Wijk et al.**

### Supplementary Table I

Overview of human ubiquitin-conjugating enzymes (MS Excel spreadsheet document (.xls))

### Supplementary Table II

Overview of human RING-type E3 ligases (MS Excel spreadsheet document (.xls))

### Supplementary Table III

Overview of binary human E2-E3 interactions (Tab-delimited text document (.txt))

### Supplementary Table IV

Overview of all background-corrected E2-E3 interactions detected on LacZ-staining (Tab-delimited text document (.txt))

### Supplementary Table V

Overview of all background-corrected E2-E3 interactions detected on LEU2-auxotrophy (Tab-delimited text document (.txt))

### Supplementary Table VI

Overview of observed E2-E3 interactions compared with literature-curated, biochemically functional interactions (MS Excel spreadsheet document (.xls))

### Supplementary Figure 1

Influence of RING-domain position relative to the full-length E3 protein on E2 interacting potential (Portable Document Format document (.pdf))

### Supplementary Figure 2

Network robustness (Portable Document Format document (.pdf))

### Supplementary Figure 3

Hub overlap index (Portable Document Format document (.pdf))

### Supplementary Figure 4

E2 similarity indices (Portable Document Format document (.pdf))

| Number of E3 interactions          | E2         |            |            | Total      |
|------------------------------------|------------|------------|------------|------------|
|                                    | N-terminal | Internal   | C-terminal |            |
| 0                                  | 48         | 66         | 31         |            |
| 1                                  | 27         | 12         | 12         |            |
| 2                                  | 5          | 3          | 6          |            |
| 3                                  | 3          | 2          | 1          |            |
| 4                                  | 1          | 0          | 2          |            |
| 5                                  | 0          | 1          | 1          |            |
| 6                                  | 1          | 0          | 3          |            |
| 7                                  | 0          | 2          | 3          |            |
| 8                                  | 0          | 6          | 2          |            |
| 9                                  | 0          | 4          | 3          |            |
| 10                                 | 0          | 1          | 2          |            |
| 11                                 | 0          | 1          | 0          |            |
| <b>Total E3</b>                    | <b>85</b>  | <b>98</b>  | <b>66</b>  | <b>249</b> |
| <b>Total E2 interactions (≥ 0)</b> | <b>56</b>  | <b>148</b> | <b>142</b> | <b>346</b> |

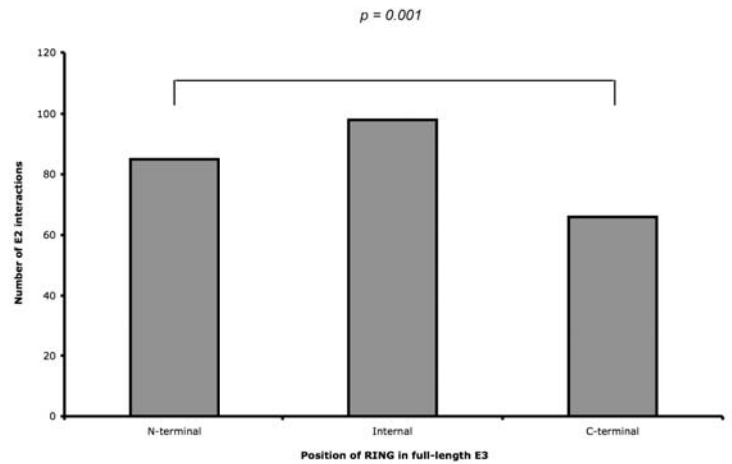

Supplementary Figure 1

*Influence of RING-domain position relative to the full-length E3 protein on E2 interaction potential* Importance of E3-connections of individual E2 nodes in the E2-E3 ubiquitination interaction network for system robustness. Individual E2 nodes were deleted from the network, followed by quantification of the number of unconnected E3s, as measure for the system's fidelity.

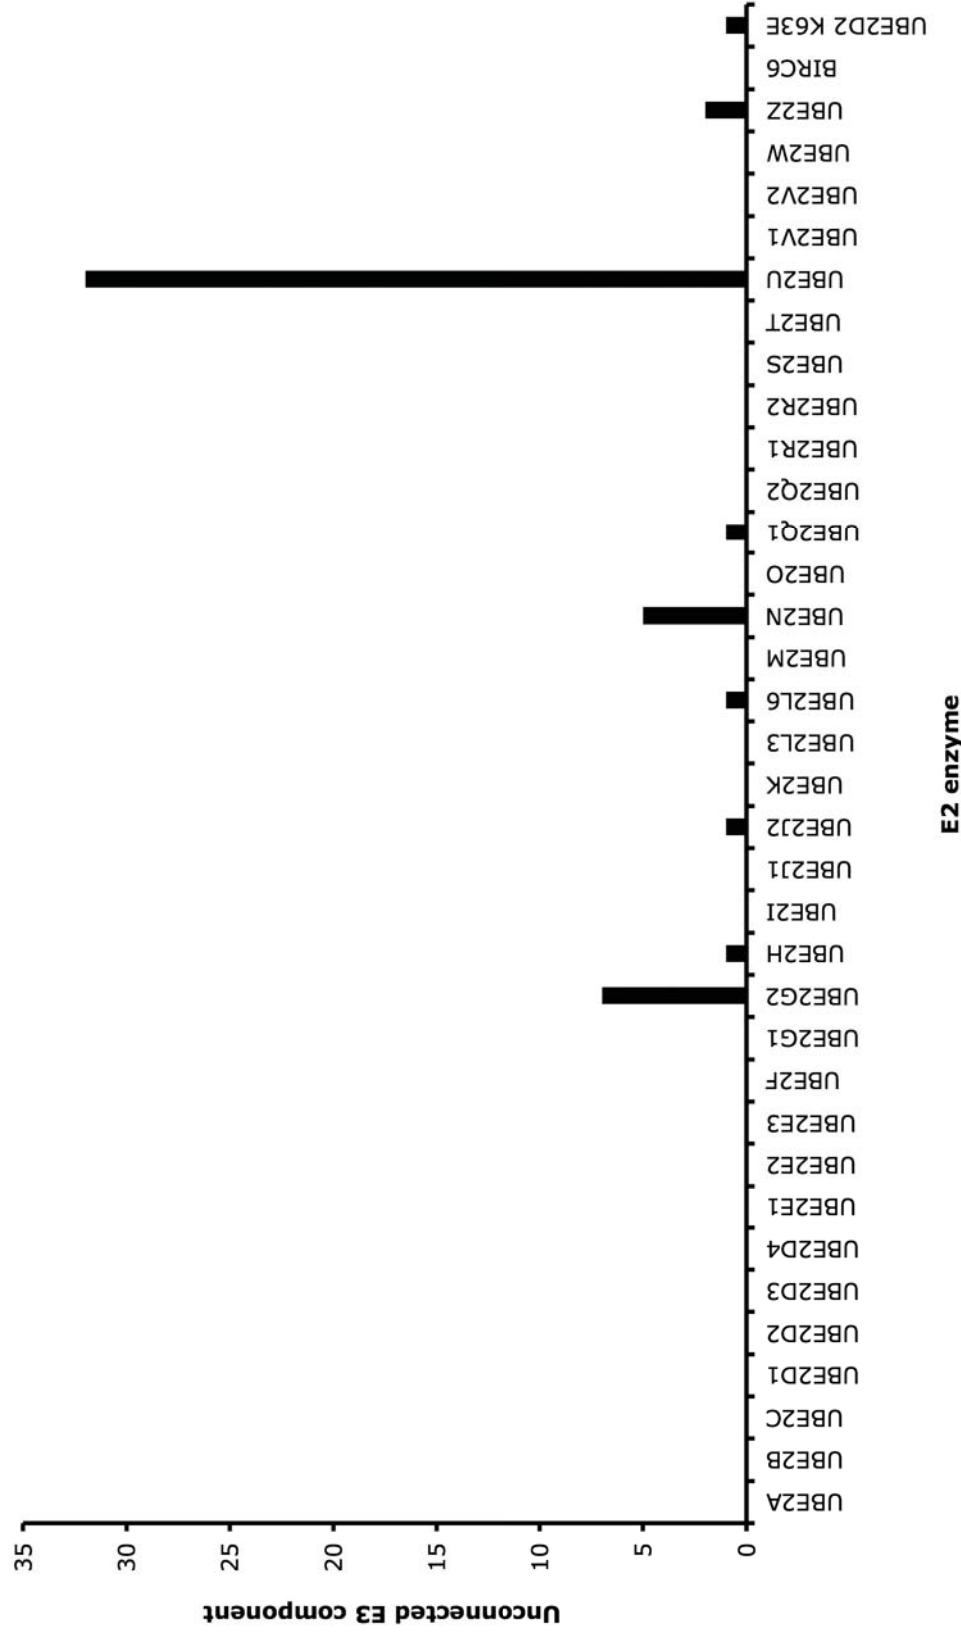

Supplementary Figure 2

Network robustness Importance of E3-connections of individual E2 nodes in the E2-E3 ubiquitination interaction network for system robustness. Individual E2 nodes were deleted from the network, followed by quantification of the number of unconnected E3s, as measure for the system's fidelity.

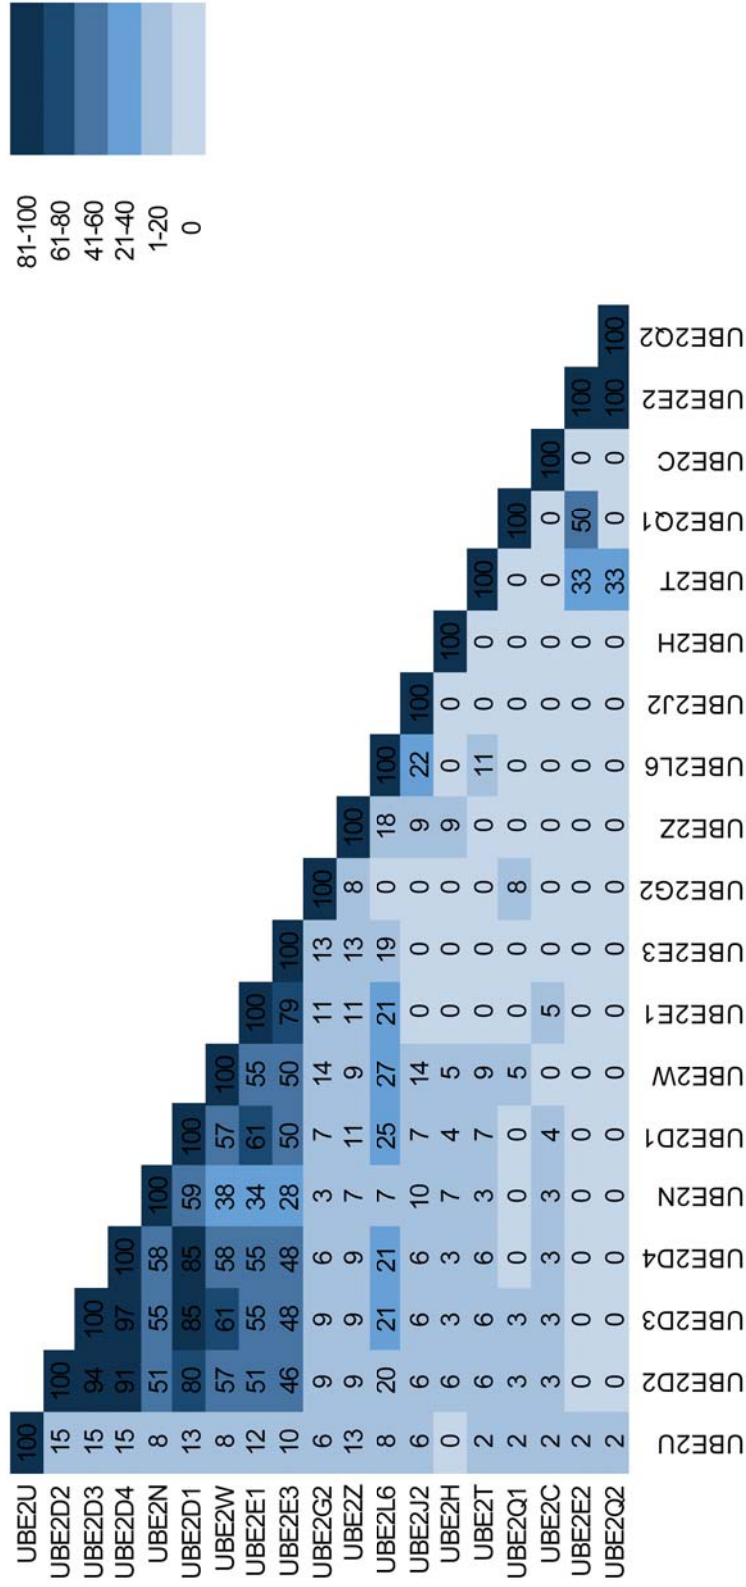

Supplementary Figure 3

*Hub overlap index* Shared E3 binding partners were calculated for each E2 showing more than one interaction.

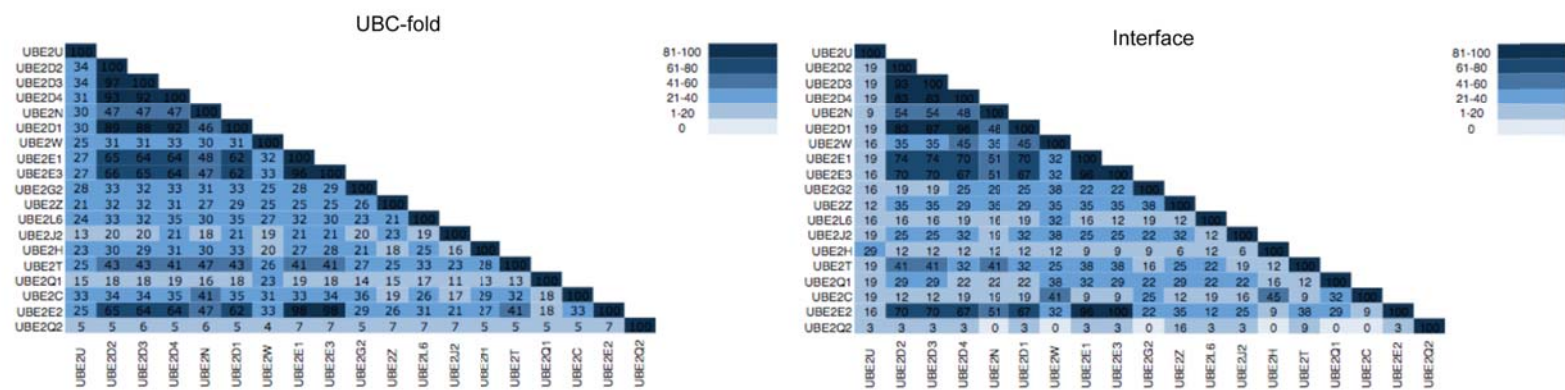

Supplementary Figure 4

*E2 similarity indices* Percentages sequence identity between all human E2 nodes in the E2-E3 network showing more than one interaction, displayed over the complete UBC-fold (left) or the predicted E3-binding interface, as determined by the CNOT4-Ubch5B model (PDB-code: 1UR6; right).
